# Supplementary material for: A Small Membrane Stabilizing Protein Critical to the Pathogenicity of Staphylococcus aureus
Source: PubMed Central journal article supplement (PMC7440758; doi:10.1128/iai.00162-20), 2020-08-19
Supplement: IAI.00162-20-s0001.pdf [file IAI.00162-20-s0001.pdf]

Supplementary Data

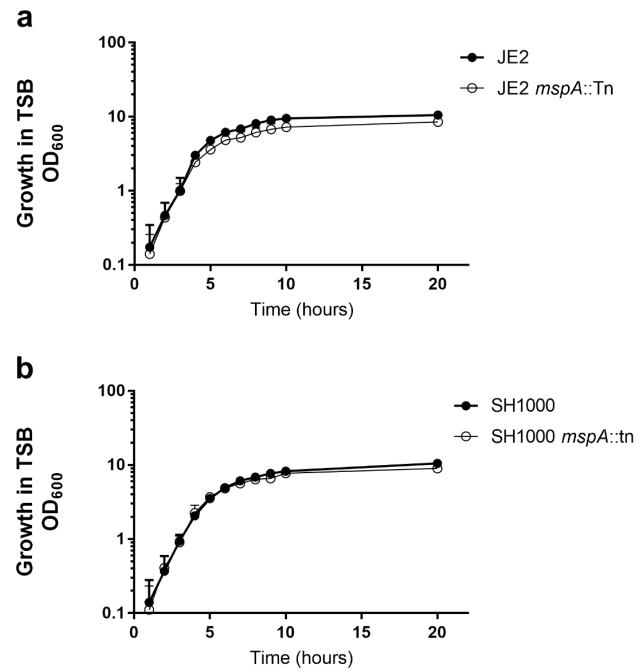

**Figure S1:** Growth curve analysis of (a) JE2 and JE2 *mspA::tn* and (b) SH1000 and SH1000 *mspA::tn* in TSB. Data shown are the means of three biological replicates.

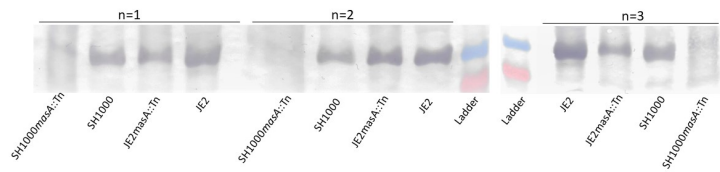

**Figure S2:** The effect of *mspA* deletion on alpha toxin secretion was determined by Western blotting using anti-alpha toxin antibodies. These blots were scanned, the relative quantity of alpha toxin quantified using ImageJ and these data presented in Figure 1E). Blots from three independent experiments are shown.

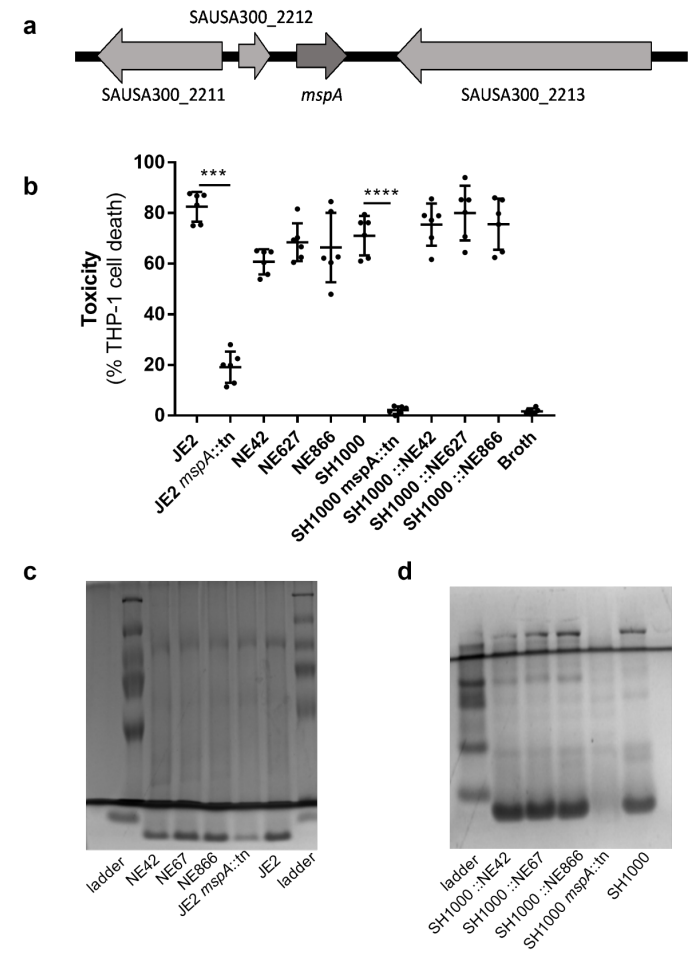

**Figure S3:** (a) A schematic showing the *mpsA* locus with *mspA* shown in dark grey and neighboring genes shown in light grey. (b) The toxicities of transposon mutants of *mpsA*-neighboring genes in both JE2 and SH1000 backgrounds were tested. NE42 showed a reduced toxicity compared to JE2, but a higher toxicity compared to JE2*mspA*::tn. In the SH1000 background, toxicities of these transposon mutants were similar to SH1000 wild type. (c) PSM abundance is not affected by the inactivation of gene to either side of *mspA*. TCA precipitated supernatants of the transposon mutants in both the JE2 and SH1000 background were separated on an SDS-PAGE gel. The PSM band runs ahead of the dye front as indicated.
